# Supplementary material for: Expedient Syntheses of Alkyl and Aryl Thioethers using Xanthates as Thiol-Free Reagents
Source: Preprints.org preprint supplement (doi:10.20944/preprints202405.1054.v1), 2024-05-15
Supplement: Supplementary file 1 [file supplementary]

**Supporting Information**

Expedient Synthesis of Alkyl and Aryl Thioethers using Xanthates as Thiol-Free Reagents

Jinli Nie 1, Ziqing He 1, Sijie Xie 1, Yibiao Li 1,* Runfa He 1, Lu Chen 1 and Xiai Luo 2,*

1 Jiangmen Key Laboratory of Synthetic Chemistry and Cleaner Production, School of Environmental & Chemical Engineering, Wuyi University, Jiangmen 529020, China

2 Hunan Province Key Laboratory for Synthetic Biology of Traditional Chinese Medicine, School of Pharmaceutical Sciences, Hunan University of Medicine, Huaihua, 418000, China

3 Guangdong Provincial Laboratory of Chemistry and Fine Chemical Engineering Jieyang Center

***** Correspondence: [luoxiai83@163.com](mailto:luoxiai83@163.com) (X. Luo); leeyib268@126.com (Y. Li)

**Table of Contents**

[A. General Information 2](#_Toc165926607)

[B. General reaction procedures 2](#_Toc165926608)

[C. Control experiment for detection of COS 3](#_Toc165926609)

[D. Characterization data for all prepared compounds 4](#_Toc165926610)

[E. 1H NMR and 13C NMR spectra for products 19](#_Toc165926611)

# A. General Information

Chemicals and solvents were purchased from commercial suppliers, such as Bidepharm and Energy Chemical, and used as received unless noted. All products were purified by flash chromatography on silica gel. The chemical yields referred are isolated products.1H NMR and 13C NMR spectra were recorded on 400 MHz, 500MHz and 600 MHz Bruker spectrometers. Chemical shifts of 1H were reported in part per million relative to the CDCl3 residual peak (δ 7.260). Chemical shifts of 13C NMR were reported relative to CDCl3 (δ 77.0). The used abbreviations are as follows: s (singlet), d (doublet), t (triplet), quart. (quartet), quint (quintet), m (multiplet), br (broad). Multiplets which arise from accidental equality of coupling constants of magnetically non-equivalent protons are marked as virtual (*virt.*). High resolution mass spectra (HRMS) data were measured on a ESI-microTOF Ⅱ. The crystal data were collected by a diffractometer Rigaku Oxford Diffraction Supernova Dual Source, Cu at Zero equipped with an AtlasS2 CCD using Cu Kα radiation (1.54178 Å) by using a w scan mode. Major elements, such as Zn, Cd, Cu, Ni, Cr et al. in reaction system were determined by using Microwave plasma-atomic emission spectrometry (Agilent/4210 MP-AES). Melting points were measured on a SGW® X-4B and are not corrected. Reactions were monitored by TLC analysis using silica gel 60 Å F-254 thin layer plates and compounds were visualized with a UV light at 254 nm or 365 nm.

# B. General reaction procedures

**General methods for the synthesis of ([1,1'-biphenyl]-4-ylmethyl)(ethyl)sulfane**

A mixture of 4-(chloromethyl)-1,1'-biphenyl (101 mg, 0.5 mmol), EtOCS2K (160 mg, 1.0 mmol) and DMSO (2 mL) was added successively in a 15 mL Schlenk tube. The Schlenk tube was then immersed in an oil bath at 100 ℃ stirring for 1 h. After cooling down to room temperature, the solution was filtered through a small amount of silica gel. Then the residue was concentrated in vacuo and the crude was purified by flash chromatography with n-hexane/ethyl acetate (50/1, v/v) to afford the ([1,1'-biphenyl]-4-ylmethyl)(ethyl)sulfane **3a** as a yellow liquid (106 mg, 93%).

**General methods for the synthesis of thiophenepyridines**

A mixture of 3-Iodine pyridine (103 mg, 0.5 mmol), EtOCS2K (192 mg, 1.2 mmol), I2 (381 mg, 1.5 mmol), and DMF (3 mL) was added successively in a 15 mL Schlenk tube. The Schlenk tube was then immersed in an oil bath at 150 ℃ stirring for 36 h. After cooling down to room temperature, the solution was filtered through a small amount of silica gel. Then the residue was concentrated in vacuo and the crude was purified by flash chromatography with n-hexane/ethyl acetate (3/1, v/v) to afford the 3-(ethylthio)pyridine **4a** as a yellow liquid (64 mg, 92%).

# C. Control experiment for detection of COS

A mixture of 3-Iodine pyridine (21 mg, 0.1 mmol), EtOCS2K (38 mg, 0.25 mmol), I2 (76 mg, 0.3 mmol), and DMF (2 mL) was added successively in a 10 mL Schlenk tube. The Schlenk tube was then immersed in an oil bath at 150 ℃ stirring for 24 h. After cooling down to room temperature, the reaction is quenched by the addition of ethyl acetate (10 mL) and saturated brine (5 mL). The organic layer was subsequently stratified and analyzed by GC-MS.

**Scheme S1.** Detection of COS by GC-MS.

# D. Characterization data for all prepared compounds

([1,1'-biphenyl]-4-ylmethyl)(ethyl)sulfane (**3a**)

Yellow liquid (106 mg, 93% yield); *Rf* = 0.6 (Hexane /EtOAc = 50:1); 1H NMR (400 MHz, CDCl3) δ 7.63 – 7.55 (m, 4H), 7.49 – 7.39 (m, 4H), 7.39 – 7.33 (m, 1H), 3.79 (s, 2H), 2.51 (d, *J* = 7.4 Hz, 2H), 1.29 (t, *J* = 7.4 Hz, 3H); 13C NMR (100 MHz, CDCl3) δ 140.8, 139.8, 137.7, 129.2 (2C), 128.7 (2C), 127.2, 127.2 (2C), 127.0 (2C), 35.5, 25.2, 14.4; HRMS (ESI-TOF) (*m/z*):[M+H]+ calcd for C15H17S+, 229.1045; found, 229.1042.

Ethyl(4-methylbenzyl)sulfane (**3b**)

Yellow liquid (76 mg, 92% yield); *Rf* = 0.6 (Hexane /EtOAc = 50:1); 1H NMR (400 MHz, CDCl3) δ 7.25 – 7.19 (m, 2H), 7.15 – 7.10 (m, 2H), 3.87 (s, 2H), 2.48 (q, *J* = 7.3 Hz, 2H), 2.34 (s, 3H), 1.24 (t, *J* = 7.4 Hz, 3H); 13C NMR (100 MHz, CDCl3) δ 137.1, 134.4, 129.2 (2C), 129.1 (2C), 43.5, 32.4, 21.1, 14.3; HRMS (ESI-TOF) (*m/z*):[M+K]+ calcd for C10H14KS+, 205.0448; found, 205.0445.

(4-(tert-butyl)benzyl)(ethyl)sulfane (**3c**)

Yellow liquid (99 mg, 95% yield); *Rf* = 0.6 (Hexane /EtOAc = 50:1); 1H NMR (400 MHz, CDCl3) δ 7.37 – 7.32 (m, 2H), 7.28 – 7.23 (m, 2H), 3.71 (s, 2H), 2.47 (q, *J* = 7.4 Hz, 2H), 1.33 (s, 9H), 1.26 (t, *J* = 7.4 Hz, 3H); 13C NMR (100 MHz, CDCl3) δ 149.7, 135.5, 128.4 (2C), 125.3 (2C), 35.4, 34.4, 31.3, 25.3, 14.3; HRMS (ESI-TOF) (*m/z*):[M+K]+ calcd for C13H20KS+, 247.0917; found, 247.0914.

Ethyl(2,4,6-trimethylbenzyl)sulfane (**3d**)

Yellow liquid (73 mg, 75% yield); *Rf* = 0.6 (Hexane /EtOAc = 50:1); 1H NMR (400 MHz, CDCl3) δ 6.85 (s, 2H), 3.78 (s, 2H), 2.61 (q, *J* = 7.4 Hz, 2H), 2.40 (s, 6H), 2.27 (s, 3H), 1.33 (t, *J* = 7.4 Hz, 3H); 13C NMR (100 MHz, CDCl3) δ 136.8 (2C), 136.3, 131.4, 129.0 (2C), 30.5, 26.8, 20.9, 19.6 (2C), 14.8; HRMS (ESI-TOF) (*m/z*):[M+H]+ calcd for C12H19S+, 195.1202; found, 195.1207.

Ethyl(3-methoxybenzyl)sulfane (**3e**)

Yellow liquid (73 mg, 80% yield); *Rf* = 0.4 (Hexane /EtOAc = 10:1); 1H NMR (400 MHz, CDCl3) δ 7.22 (t, *J* = 7.8 Hz, 1H), 6.94 – 6.85 (m, 2H), 6.82 – 6.76 (m, 1H), 3.81 (s, 3H), 3.70 (s, 2H), 2.45 (q, *J* = 7.4 Hz, 2H), 1.24 (t, *J* = 7.4 Hz, 3H); 13C NMR (100 MHz, CDCl3) δ 159.7, 140.2, 129.4, 121.2, 114.3, 112.4, 55.2, 35.9, 25.3, 14.3; HRMS (ESI-TOF) (*m/z*):[M+K]+ calcd for C10H14KOS+, 221.0397; found, 221.0395.

(4-(benzyloxy)benzyl)(ethyl)sulfane (**3f**)

Yellow solid (120 mg, 93% yield), MP: 61-62 oC; *Rf* = 0.4 (Hexane /EtOAc = 20:1); 1H NMR (400 MHz, CDCl3) δ 7.46 – 7.37 (m, 4H), 7.36 – 7.30 (m, 1H), 7.26 – 7.21 (m, 2H), 6.95 – 6.90 (m, 2H), 5.06 (s, 2H), 3.69 (s, 2H), 2.44 (q, *J* = 7.2 Hz, 2H), 1.24 (t, *J* = 7.4 Hz, 3H); 13C NMR (100 MHz, CDCl3) δ 157.7, 137.0, 130.9, 129.8 (2C), 128.6 (2C), 127.9, 127.4 (2C), 114.8 (2C), 79.7 – 74.5 (m), 70.0, 35.2, 25.1, 14.4; HRMS (ESI-TOF) (*m/z*):[M+H]+ calcd for C16H19OS+, 259.1151; found, 259.1149.

Ethyl(4-(trifluoromethoxy)benzyl)sulfane (**3g**)

Yellow liquid (111 mg, 94% yield); *Rf* = 0.5 (Hexane /EtOAc = 50:1); 1H NMR (400 MHz, CDCl3) δ 7.34 (d, *J* = 8.3 Hz, 2H), 7.15 (d, *J* = 8.2 Hz, 2H), 3.71 (s, 2H), 2.44 (q, *J* = 7.4 Hz, 2H), 1.23 (t, *J* = 7.4 Hz, 3H); 13C NMR (100 MHz, CDCl3) δ 148.1 (q, *J* = 1.8 Hz), 137.4, 130.1 (2C), 121.0 (2C), 120.5 (q, *J* = 204.2 Hz), 35.1, 25.3, 14.3; 19F NMR (376 MHz, CDCl3) δ -57.86; HRMS (ESI-TOF) (*m/z*):[M+Na]+ calcd for C10H11F3NaOS+, 259.0375; found, 259.0371.

Ethyl(4-((trifluoromethyl)thio)benzyl)sulfane (**3h**)

Yellow liquid (166 mg, 92% yield); *Rf* = 0.6 (Hexane /EtOAc = 50:1); 1H NMR (400 MHz, CDCl3) δ 7.63 – 7.56 (m, 2H), 7.40 – 7.34 (m, 2H), 3.73 (s, 2H), 2.44 (q, *J* = 7.4 Hz, 2H), 1.23 (t, *J* = 7.4 Hz, 3H); 13C NMR (100 MHz, CDCl3) δ 142.0, 136.4 (2C), 129.9 (2C), 129.5 (q, *J* = 306.1 Hz), 122.6 (q, *J* = 2.3 Hz), 35.4, 25.4, 14.3; 19F NMR (376 MHz, Chloroform-*d*) δ -42.58; HRMS (ESI-TOF) (*m/z*):[M+H]+ calcd for C10H12F3S2+, 253.0327; found, 253.0320.

Ethyl(4-(phenylthio)benzyl)sulfane (**3i**)

Yellow liquid (121 mg, 93% yield); *Rf* = 0.5 (Hexane /EtOAc = 50:1); 1H NMR (400 MHz, CDCl3) δ 7.37 – 7.21 (m, 9H), 3.70 (s, 2H), 2.45 (q, *J* = 7.4 Hz, 2H), 1.24 (t, *J* = 7.4 Hz, 3H); 13C NMR (100 MHz, CDCl3) δ 137.7, 135.8, 134.0, 131.2 (4C), 130.8 (4C), 129.6 (4C), 129.1 (4C), 126.9, 35.4, 25.3, 14.3; HRMS (ESI-TOF) (*m/z*):[M+Na]+ calcd for C15H16NaS2+, 283.0586; found, 283.0593.

(4-((ethylthio)methyl)phenyl)methanol (**3j**)

Yellow liquid (82 mg, 90% yield); *Rf* = 0.5 (Hexane /EtOAc = 2:1); 1H NMR (400 MHz, CDCl3) δ 7.33 – 7.27 (m, 4H), 4.65 (s, 2H), 3.71 (s, 2H), 2.42 (q, *J* = 7.3 Hz, 2H), 1.91 (s, 1H), 1.22 (t, *J* = 7.4 Hz, 3H); 13C NMR (100 MHz, CDCl3) δ 139.5, 138.0, 128.9 (2C), 127.1 (2C), 65.0, 35.5, 25.2, 14.3; HRMS (ESI-TOF) (*m/z*):[M+K]+ calcd for C10H14KOS+, 221.0397; found, 221.0395.

2-(4-((ethylthio)methyl)phenyl)-4,4,5,5-tetramethyl-1,3,2-dioxaborolane (**3k**)

Yellow liquid (127 mg, 91% yield); *Rf* = 0.5 (Hexane /EtOAc = 20:1); 1H NMR (400 MHz, CDCl3) δ 7.78 – 7.73 (m, 2H), 7.36 – 7.30 (m, 2H), 3.72 (s, 2H), 2.41 (q, *J* = 7.4 Hz, 2H), 1.34 (s, 12H), 1.21 (t, *J* = 7.4 Hz, 3H); 13C NMR (100 MHz, CDCl3) δ 141.9, 141.8, 134.9 (2C), 128.2 (2C), 83.7 (2C), 35.9, 25.1, 24.8 (4C), 14.3; HRMS (ESI-TOF) (*m/z*):[M+H]+ calcd for C15H24BO2S+, 278.1621; found, 278.1624.

Ethyl(4-fluorobenzyl)sulfane (**3l**)

Yellow liquid (81 mg, 95% yield); *Rf* = 0.6 (Hexane /EtOAc = 50:1); 1H NMR (400 MHz, CDCl3) δ 7.31 – 7.25 (m, 2H), 7.03 – 6.95 (m, 2H), 3.69 (s, 2H), 2.43 (q, *J* = 7.3 Hz, 2H), 1.23 (t, *J* = 7.4 Hz, 3H); 13C NMR (100 MHz, CDCl3) δ 161.8 (d, *J* = 245.2 Hz), 134.3 (d, *J* = 3.0 Hz), 130.3 (d, *J* = 8.0 Hz, 2C), 115.3 (d, *J* = 21.4 Hz, 2C), 35.1, 25.2, 14.3; 19F NMR (376 MHz, CDCl3) δ -112.92 (ddd, *J* = 13.9, 8.6, 5.2 Hz); HRMS (ESI-TOF) (*m/z*):[M+Na]+ calcd for C9H11FNaS+, 193.0458; found, 193.0466.

(4-chlorobenzyl)(ethyl)sulfane (**3m**)

Yellow liquid (84 mg, 90% yield); *Rf* = 0.6 (Hexane /EtOAc = 50:1); 1H NMR (400 MHz, CDCl3) δ 7.30 – 7.26 (m, 2H), 7.24 (d, *J* = 8.7 Hz, 2H), 3.68 (s, 2H), 2.42 (q, *J* = 7.4 Hz, 2H), 1.22 (t, *J* = 7.4 Hz, 3H); 13C NMR (100 MHz, CDCl3) δ 137.1, 132.6, 130.1 (2C), 128.6 (2C), 35.2, 25.2, 14.3; HRMS (ESI-TOF) (*m/z*):[M+Na]+ calcd for C9H11ClNaS+, 209.0162; found, 209.0152.

(4-bromobenzyl)(ethyl)sulfane (**3n**)

Yellow liquid (106 mg, 92% yield); *Rf* = 0.6 (Hexane /EtOAc = 50:1); 1H NMR (400 MHz, CDCl3) δ 7.47 – 7.39 (m, 2H), 7.22 – 7.16 (m, 2H), 3.66 (s, 2H), 2.42 (q, *J* = 7.4 Hz, 2H), 1.22 (t, *J* = 7.4 Hz, 3H); 13C NMR (100 MHz, CDCl3) δ 137.7, 131.5 (2C), 130.5 (2C), 120.6, 35.2, 25.2, 14.3; HRMS (ESI-TOF) (*m/z*):[M+H]+ calcd for C9H12BrS+, 230.9838; found, 230.9828.

Ethyl(4-Iodobenzyl)sulfane (**3o**)

Yellow liquid (132 mg, 95% yield); *Rf* = 0.6 (Hexane /EtOAc = 50:1); 1H NMR (400 MHz, CDCl3) δ 7.67 – 7.58 (m, 2H), 7.10 – 7.03 (m, 2H), 3.65 (s, 2H), 2.41 (q, *J* = 7.4 Hz, 2H), 1.22 (t, *J* = 7.4 Hz, 3H); 13C NMR (100 MHz, CDCl3) δ 138.3, 137.5 (2C), 130.8 (2C), 92.1, 35.3, 25.2, 14.3; HRMS (ESI-TOF) (*m/z*):[M+H]+ calcd for C9H12IS+, 278.9699; found, 278.9693.

Ethyl(4-(trifluoromethyl)benzyl)sulfane (**3p**)

Yellow liquid (103 mg, 94% yield); *Rf* = 0.6 (Hexane /EtOAc = 50:1); 1H NMR (400 MHz, CDCl3) δ 7.57 (d, *J* = 8.0 Hz, 2H), 7.43 (d, *J* = 8.0 Hz, 2H), 3.75 (s, 2H), 2.43 (q, *J* = 7.4 Hz, 2H), 1.24 (t, *J* = 7.4 Hz, 3H); 13C NMR (100 MHz, CDCl3) δ 142.9, 129.1 (2C), 129.1 (q, *J* = 31.7 Hz), 125.4 (q, *J* = 3.8 Hz, 2C), 124.2 (q, *J* = 269.9 Hz), 35.4, 25.3, 14.2; 19F NMR (376 MHz, CDCl3) δ -62.71; HRMS (ESI-TOF) (*m/z*):[M+Na]+ calcd for C10H11F3NaOS+, 259.0375; found, 259.0371.

Ethyl(4-(methylsulfonyl)benzyl)sulfane (**3q**)

Yellow liquid (105 mg, 91% yield); *Rf* = 0.4 (Hexane /EtOAc = 1:1); 1H NMR (400 MHz, CDCl3) δ 7.91 – 7.82 (m, 2H), 7.54 – 7.46 (m, 2H), 3.75 (s, 2H), 3.03 (s, 3H), 2.42 (q, *J* = 7.4 Hz, 2H), 1.21 (t, *J* = 7.4 Hz, 3H); 13C NMR (100 MHz, CDCl3) δ 145.3, 138.9, 129.6 (2C), 127.5 (2C), 44.4, 35.4, 25.4, 14.2; HRMS (ESI-TOF) (*m/z*):[M+H]+ calcd for C10H15O2S2+, 231.0508; found, 231.0503.

4-((ethylthio)methyl)-N-phenylbenzamide (**3r**)

White solid (126 mg, 93% yield), MP: 118-120 oC; *Rf* = 0.4 (Hexane /EtOAc = 3:1); 1H NMR (400 MHz, CDCl3) δ 8.08 (s, 1H), 7.83 – 7.76 (m, 2H), 7.66 – 7.61 (m, 2H), 7.40 – 7.30 (m, 4H), 7.16 – 7.10 (m, 1H), 3.74 (s, 2H), 2.50 – 2.36 (m, 2H), 1.23 (t, *J* = 7.4 Hz, 3H); 13C NMR (100 MHz, CDCl3) δ 165.6, 142.8, 137.9, 133.5, 129.1 (2C), 129.0 (2C), 127.3 (2C), 124.5, 120.3 (2C), 35.5, 25.3, 14.3; HRMS (ESI-TOF) (*m/z*):[M+H]+ calcd for C16H18NOS+, 272.1104; found, 272.1098.

Ethyl(naphthalen-1-ylmethyl)sulfane (**3s**)

Yellow liquid (94 mg, 93% yield); *Rf* = 0.6 (Hexane /EtOAc = 50:1); 1H NMR (400 MHz, CDCl3) δ 8.16 (d, *J* = 8.3 Hz, 1H), 7.89 – 7.84 (m, 1H), 7.81 – 7.73 (m, 1H), 7.59 – 7.53 (m, 1H), 7.52 – 7.47 (m, 1H), 7.44 – 7.35 (m, 2H), 4.19 (s, 2H), 2.51 (q, *J* = 7.3 Hz, 2H), 1.28 (t, *J* = 7.4 Hz, 3H); 13C NMR (100 MHz, CDCl3) δ 134.1, 133.9, 131.4, 128.8, 128.0, 126.9, 126.1, 125.8, 125.1, 124.1, 33.7, 26.0, 14.4; HRMS (ESI-TOF) (*m/z*):[M]+ calcd for C13H14S+, 202.0811; found, 202.0816.

Ethyl(naphthalen-2-ylmethyl)sulfane (**3t**)

Yellow liquid (96 mg, 95% yield); *Rf* = 0.6 (Hexane /EtOAc = 50:1); 1H NMR (400 MHz, CDCl3) δ 7.87 – 7.79 (m, 3H), 7.72 (s, 1H), 7.55 – 7.44 (m, 3H), 3.90 (s, 2H), 2.46 (q, *J* = 7.4 Hz, 2H), 1.26 (t, *J* = 7.4 Hz, 3H); 13C NMR (100 MHz, CDCl3) δ 135.9, 133.2, 132.5, 128.3, 127.6, 127.6, 127.1, 126.1, 125.6, 36.1, 25.1, 14.3; HRMS (ESI-TOF) (*m/z*):[M]+ calcd for C13H14S+, 202.0811; found, 202.0818.

(Anthracen-9-ylmethyl)(ethyl)sulfane (**3u**)

Yellow solid (53 mg, 42% yield), MP: 68-70 oC; *Rf* = 0.6 (Hexane /EtOAc = 50:1); 1H NMR (400 MHz, CDCl3) δ 8.39 (s, 1H), 8.35 (d, *J* = 8.9 Hz, 2H), 8.01 (d, *J* = 8.4 Hz, 2H), 7.61 – 7.53 (m, 2H), 7.52 – 7.44 (m, 2H), 4.75 (s, 2H), 2.70 (q, *J* = 7.4 Hz, 2H), 1.37 (t, *J* = 7.4 Hz, 3H); 13C NMR (100 MHz, CDCl3) δ 131.5 (2C), 129.9 (2C), 129.5, 129.2 (2C), 127.2, 126.0 (2C), 125.0 (2C), 124.2 (2C), 28.7, 27.1, 14.8; HRMS (ESI-TOF) (*m/z*):[M+H]+ calcd for C17H17S+, 253.1045; found, 253.1045.

2-chloro-5-((ethylthio)methyl)thiophene (**3v**)

Yellow liquid (89 mg, 93% yield); *Rf* = 0.6 (Hexane /EtOAc = 50:1); 1H NMR (400 MHz, CDCl3) δ 6.73 – 6.66 (m, 2H), 3.82 (s, 2H), 2.51 (q, *J* = 7.4 Hz, 2H), 1.24 (t, *J* = 7.4 Hz, 3H); 13C NMR (100 MHz, CDCl3) δ 141.4, 128.8, 125.5, 125.0, 30.4, 25.4, 14.2; HRMS (ESI-TOF) (*m/z*):[M+H]+ calcd for C7H10ClS2+, 192.9907; found, 192.9902.

5-chloro-3-((ethylthio)methyl)benzo[b]thiophene (**3w**)

Yellow liquid (111 mg, 92% yield); *Rf* = 0.6 (Hexane /EtOAc = 50:1); 1H NMR (400 MHz, CDCl3) δ 7.88 – 7.84 (m, 1H), 7.74 (d, *J* = 8.6 Hz, 1H), 7.35 – 7.29 (m, 2H), 3.92 (s, 3H), 2.48 (q, *J* = 7.4 Hz, 2H), 1.26 (t, *J* = 7.4 Hz, 3H); 13C NMR (100 MHz, CDCl3) δ 139.1, 138.7, 131.9, 130.4, 125.4, 124.9, 123.8, 121.9, 28.9, 25.7, 14.2; HRMS (ESI-TOF) (*m/z*):[M+Na]+ calcd for C11H11ClNaS2+, 264.9883; found, 264.9884.

8-((ethylthio)methyl)quinoline (**3x**)

Yellow liquid (92 mg, 91% yield); *Rf* = 0.4 (Hexane /EtOAc = 10:1); 1H NMR (400 MHz, CDCl3) δ 8.97 – 8.93 (m, 1H), 8.16 – 8.09 (m, 1H), 7.71 (d, *J* = 7.7 Hz, 2H), 7.52 – 7.45 (m, 1H), 7.42 – 7.37 (m, 1H), 4.44 (s, 2H), 2.56 (q, *J* = 7.4 Hz, 2H), 1.28 (t, *J* = 7.4 Hz, 3H); 13C NMR (100 MHz, CDCl3) δ 149.6, 146.3, 137.3, 136.3, 129.3, 128.5, 127.0, 126.1, 121.1, 31.1, 26.1, 14.5; HRMS (ESI-TOF) (*m/z*):[M+H]+ calcd for C12H14NS+, 204.0842; found, 204.0843.

2-((ethylthio)methyl)-4-methylquinazoline (**3y**)

Yellow solid (95 mg, 87% yield), MP: 52-54 oC; *Rf* = 0.6 (Hexane /EtOAc = 50:1); 1H NMR (400 MHz, CDCl3) δ 8.03 – 7.98 (m, 1H), 7.95 – 7.89 (m, 1H), 7.82 – 7.76 (m, 1H), 7.56 – 7.50 (m, 1H), 4.01 (s, 2H), 2.89 (s, 3H), 2.62 (q, *J* = 7.4 Hz, 2H), 1.24 (t, *J* = 7.4 Hz, 3H); 13C NMR (100 MHz, CDCl3) δ 168.8, 163.6, 149.6, 133.5, 128.5, 126.9, 124.8, 122.5, 39.1, 25.9, 21.7, 14.4; HRMS (ESI-TOF) (*m/z*):[M+H]+ calcd for C12H15N2S+, 219.0950; found, 219.0942.

1-(4-((ethylthio)methyl)phenyl)-1H-pyrazole (**3z**)

Yellow liquid (93 mg, 85% yield); *Rf* = 0.5 (Hexane /EtOAc = 10:1); 1H NMR (400 MHz, CDCl3) δ 7.95 – 7.88 (m, 1H), 7.74 – 7.70 (m, 1H), 7.64 (d, *J* = 8.3 Hz, 2H), 7.45 – 7.37 (m, 2H), 3.75 (s, 2H), 2.45 (q, *J* = 7.3, 6.8 Hz, 2H), 1.24 (t, *J* = 7.3 Hz, 3H); 13C NMR (100 MHz, CDCl3) δ 141.0, 139.0, 136.9, 129.8 (2C), 126.7, 119.3 (2C), 107.6, 35.3, 25.2, 14.4; HRMS (ESI-TOF) (*m/z*):[M+H]+ calcd for C12H15N2S+, 219.0950; found, 219.0946.

1-cyclohexyl-5-(4-(ethylthio)butyl)-1H-tetrazole (**3aa**)

Yellow liquid (123 mg, 92% yield); *Rf* = 0.4 (Hexane /EtOAc = 2:1); 1H NMR (400 MHz, CDCl3) δ 4.21 – 4.04 (m, 1H), 2.85 (t, 2H), 2.61 – 2.48 (m, 3H), 2.09 – 1.87 (m, 8H), 1.82 – 1.66 (m, 4H), 1.48 – 1.30 (m, 3H), 1.24 (t, *J* = 7.4 Hz, 3H); 13C NMR (100 MHz, CDCl3) δ 153.5, 57.6, 32.9 (2C), 30.9, 28.6, 26.2, 25.9, 25.3 (2C), 24.8, 22.9, 14.8; HRMS (ESI-TOF) (*m/z*):[M+H]+ calcd for C13H25N4S+, 269.1794; found, 269.1790.

1,4-bis((ethylthio)methyl)benzene (**3ab**)

Yellow liquid (99 mg, 88% yield); *Rf* = 0.5 (Hexane /EtOAc = 50:1); 1H NMR (400 MHz, CDCl3) δ 7.25 (s, 4H), 3.70 (s, 4H), 2.43 (q, *J* = 7.4 Hz, 4H), 1.23 (t, *J* = 7.4 Hz, 6H); 13C NMR (100 MHz, CDCl3) δ 137.2 (2C), 128.9 (4C), 35.5, 25.2, 14.4; HRMS (ESI-TOF) (*m/z*):[M]+ calcd for C12H18S2+, 226.0845; found, 226.0836.

(((1s,3s)-adamantan-1-yl)methyl)(ethyl)sulfane (**3ac**)

Yellow liquid (42 mg, 40% yield); *Rf* = 0.6 (Hexane /EtOAc = 50:1); 1H NMR (400 MHz, CDCl3) δ 2.51 (q, *J* = 7.4 Hz, 2H), 2.32 (s, 2H), 1.97 (s, 3H), 1.73 – 1.66 (m, 3H), 1.65 – 1.59 (m, 3H), 1.58 – 1.54 (m, 6H), 1.24 (t, *J* = 7.4 Hz, 3H); 13C NMR (100 MHz, CDCl3) δ 47.3, 41.9 (3C), 36.9 (3C), 33.9, 28.6 (3C), 28.2, 15.0; HRMS (ESI-TOF) (*m/z*):[M+K]+ calcd for C13H22KS+, 249.1074; found, 249.1075.

Benzhydryl(ethyl)sulfane (**3ad**)

Yellow liquid (80 mg, 70% yield); *Rf* = 0.6 (Hexane /EtOAc = 50:1); 1H NMR (400 MHz, CDCl3) δ 7.50 – 7.44 (m, 4H), 7.38 – 7.31 (m, 4H), 7.30 – 7.21 (m, 2H), 5.22 (s, 1H), 2.44 (q, *J* = 7.4 Hz, 2H), 1.25 (t, *J* = 7.4 Hz, 3H); 13C NMR (100 MHz, CDCl3) δ 141.5 (2C), 128.5 (4C), 128.2 (4C), 127.0 (2C), 53.7, 26.2, 14.2; HRMS (ESI-TOF) (*m/z*):[M+H]+ calcd for C15H17S+, 229.1045; found, 229.1046.

Dibenzylsulfane (**3ae**) [1]

White solid (100 mg, 93% yield), MP: 61-62 oC; *Rf* = 0.6 (Hexane/EtOAc = 50:1); 1H NMR (400 MHz, CDCl3) δ 7.36 – 7.22 (m, 10H), 3.61 (s, 4H); 13C NMR (100 MHz, CDCl3) δ 138.1 (2C), 129.0 (4C), 128.5 (4C), 127.0 (2C), 35.6 (2C).

benzyl(phenyl)sulfane (**3af**) [2]

White solid (90 mg, 90% yield), MP: 39-40 oC; *Rf* = 0.6 (Hexane/EtOAc = 50:1); 1H NMR (400 MHz, CDCl3) δ 7.34 – 7.22 (m, 9H), 7.21 – 7.15 (m, 1H), 4.13 (s, 2H); 13C NMR (100 MHz, CDCl3) δ 137.4, 136.3, 129.8 (2C), 128.8 (2C), 128.8 (2C), 128.5 (2C), 127.2, 126.3, 39.0.

Benzyl(ethyl)sulfane (**3ag**)

Yellow liquid (27 mg, 36% yield); *Rf* = 0.6 (Hexane /EtOAc = 50:1); 1H NMR (500 MHz, CDCl3) δ 7.35 – 7.28 (m, 4H), 7.26 – 7.21 (m, 1H), 3.73 (s, 2H), 2.44 (q, *J* = 7.4 Hz, 2H), 1.23 (t, *J* = 7.4 Hz, 3H); 13C NMR (125 MHz, CDCl3) δ 138.6, 128.8 (2C), 128.4 (2C), 126.8, 35.8, 25.2, 14.3; HRMS (ESI-TOF) (*m/z*):[M+H]+ calcd for C9H13S+, 153.0732; found, 153.0735.

Benzyl(butyl)sulfane (**3ah**)

Yellow liquid (33 mg, 37% yield); *Rf* = 0.6 (Hexane /EtOAc = 50:1); 1H NMR (400 MHz, CDCl3) δ 7.35 – 7.25 (m, 4H), 7.28 – 7.19 (m, 1H), 3.71 (s, 2H), 2.49 – 2.35 (m, 2H), 1.60 – 1.49 (m, 2H), 1.38 (dt, *J* = 8.1, 7.0 Hz, 2H), 0.89 (t, *J* = 7.3 Hz, 3H); 13C NMR (100 MHz, CDCl3) 138.7, 128.8 (2C), 128.4 (2C), 126.8, 36.2, 31.3, 31.0, 22.0, 13.7; HRMS (ESI-TOF) (*m/z*):[M+H]+ calcd for C11H17S+, 181.1045; found, 181.1050.

3-(Ethylthio)pyridine (**4a**)[3]

Yellow liquid (64 mg, 92 % yield); *Rf*= 0.5 (Hexane/EtOAc = 3:1); 1H NMR (500 MHz, CDCl3) *δ* 8.56 (s, 1H), 8.41 (d, *J* = 4.8 Hz, 1H), 7.66 (ddd, *J* = 8.0, 2.4, 1.5 Hz, 1H), 7.23 (dd, *J* = 8.0, 4.8 Hz, 1H), 2.96 (q, *J* = 7.4 Hz, 2H), 1.32 (t, *J* = 7.4 Hz, 3H)；13C NMR (125 MHz, CDCl3) *δ* 149.6, 146.5, 137.1, 134.0, 123.7, 27.7, 14.3.

3-(Propylthio)pyridine (**4b**)[4]

Yellow liquid (58 mg, 75%); *Rf*= 0.5 (Hexane/EtOAc = 3:1); 1H NMR (500 MHz, CDCl3) *δ* 8.56 (d, *J* = 1.8 Hz, 1H), 8.48 – 8.35 (m, 1H), 7.69 – 7.60 (m, 1H), 7.21 (dd, *J* = 7.9, 4.8 Hz, 1H), 2.96 – 2.74 (m, 2H), 1.67 (h, *J* = 7.3 Hz, 2H), 1.03 (t, *J* = 7.4 Hz, 3H); 13C NMR (125 MHz, CDCl3) *δ* 149.9, 146.7, 136.8, 134.1, 123.6, 35.7, 22.4, 13.3.

3-(Butylthio)pyridine (**4c**)[5]

Yellow liquid (62 mg, 74%); *Rf*= 0.5 (Hexane/EtOAc = 3:1); 1H NMR (500 MHz, CDCl3) *δ* 8.55 (s, 1H), 8.41 (d, *J* = 4.2 Hz, 1H), 7.66 (dt, *J* = 8.0, 1.8 Hz, 1H), 7.24 (dd, *J* = 7.9, 4.8 Hz, 1H), 2.97 – 2.90 (m, 2H), 1.63 (p, *J* = 7.4 Hz, 2H), 1.45 (dq, *J* = 14.6, 7.3 Hz, 2H), 0.92 (t, *J* = 7.3 Hz, 3H); 13C NMR (125 MHz, CDCl3) *δ* 149.2, 146.2, 137.0, 134.6, 123.7, 33.3, 31.1, 21.8, 13.6.

3-(Pentylthio)pyridine (**4d**)

Yellow liquid (67 mg, 74%); *Rf*= 0.5 (Hexane/EtOAc = 3:1); 1H NMR (500 MHz, CDCl3) *δ* 8.55 (s, 1H), 8.41 (s, 1H), 7.66 (d, *J* = 7.9 Hz, 1H), 7.24 – 7.21 (m, 1H), 2.92 (t, *J* = 7.4 Hz, 2H), 1.64 (p, *J* = 7.4 Hz, 2H), 1.40 (dt, *J* = 14.3, 6.9 Hz, 2H), 1.32 (dq, *J* = 14.3, 6.9 Hz, 2H), 0.89 (t, *J* = 7.2 Hz, 3H); 13C NMR (125 MHz, CDCl3) *δ* 149.4, 146.4, 136.9, 134.4, 123.6, 33.6, 30.8, 28.7, 22.2, 13.9. HRMS (ESI-TOF) (m/z): [M+H]+ calcd for C10H16NS+, 182.0998; found, 182.0995.

3-(Ethylthio)quinoline (**4e**)[6]

Yellow liquid (89 mg, 94% yield); *Rf*= 0.4 (Hexane/EtOAc = 5:1); 1H NMR (500 MHz, CDCl3) *δ* 8.84 (d, *J* = 2.3 Hz, 1H), 8.10 (d, *J* = 8.4 Hz, 1H), 8.07 (d, *J* = 2.3 Hz, 1H), 7.75 (dd, *J* = 8.2, 1.4 Hz, 1H), 7.68 (ddd, *J* = 8.4, 6.9, 1.4 Hz, 1H), 7.56 (ddd, *J* = 8.2, 6.9, 1.2 Hz, 1H), 3.06 (q, *J* = 7.4 Hz, 2H), 1.37 (t, *J* = 7.4 Hz, 3H)；13C NMR (125 MHz, CDCl3) *δ* 151.6, 146.2, 134.8, 130.6, 129.3, 129.0, 128.2, 127.2, 126.9, 27.9, 14.3.

4-(Ethylthio)isoquinoline (**4f**)[6]

Yellow liquid (80 mg, 85% yield); *Rf*= 0.4 (Hexane/EtOAc = 5:1); 1H NMR (500 MHz, CDCl3) *δ* 9.12 (s, 1H), 8.55 (s, 1H), 8.31 (d, *J* = 8.4 Hz, 1H), 7.98 (d, *J* = 8.1 Hz, 1H), 7.77 (ddd, *J* = 8.3, 6.8, 1.3 Hz, 1H), 7.64 (ddd, *J* = 8.1, 6.8, 1.1 Hz, 1H), 3.01 (q, *J* = 7.3 Hz, 2H), 1.32 (t, *J* = 7.4 Hz, 3H); 13C NMR (125 MHz, CDCl3) *δ* 151.0, 143.7, 135.9, 130.9, 128.7, 128.4, 128.2, 127.67, 124.1, 28.3, 14.5.

2-(Ethylthio)pyridine (**4g**)[7]

Yellow liquid (63 mg, 90% yield); *Rf*= 0.4 (Hexane/EtOAc = 5:1); 1H NMR (500 MHz, CDCl3) *δ* 8.41 (ddd, *J* = 5.0, 1.9, 1.0 Hz, 1H), 7.50 – 7.41 (m, 1H), 7.15 (dt, *J* = 8.1, 1.1 Hz, 1H), 6.95 (ddd, *J* = 7.3, 4.9, 1.1 Hz, 1H), 3.16 (q, *J* = 7.4 Hz, 2H), 1.36 (t, *J* = 7.4 Hz, 3H); 13C NMR (125 MHz, CDCl3) *δ* 159.3, 149.3, 135.8, 122.1, 119.2, 24.4, 14.5.

2-(Ethylthio)-3-methylpyridine (**4h**)

Yellow liquid (71 mg, 93% yield); *Rf*= 0.4 (Hexane/EtOAc = 5:1); 1H NMR (500 MHz, CDCl3) *δ* 8.29 (dd, *J* = 4.9, 1.7 Hz, 1H), 7.30 (ddd, *J* = 7.4, 1.8, 0.9 Hz, 1H), 6.90 (dd, *J* = 7.4, 4.9 Hz, 1H), 3.22 (q, *J* = 7.4 Hz, 2H), 2.24 (s, 3H), 1.38 (t, *J* = 7.4 Hz, 3H); 13C NMR (125 MHz, CDCl3) *δ* 158.2, 146.4, 136.2, 130.9, 118.8, 24.0, 18.6, 14.6. HRMS (ESI-TOF) (m/z): [M+H]+ calcd for C8H12NS+, 154.0685; found, 154.0685.

2-(Ethylthio)-4-methylpyridine (**4i**)

Yellow liquid (69 mg, 90% yield); *Rf*= 0.4 (Hexane/EtOAc = 5:1); 1H NMR (500 MHz, CDCl3) *δ* 8.28 (d, *J* = 5.1 Hz, 1H), 6.99 (s, 1H), 6.79 (dd, *J* = 5.2, 1.5 Hz, 1H), 3.15 (q, *J* = 7.4 Hz, 2H), 2.26 (s, 3H), 1.36 (t, *J* = 7.4 Hz, 3H); 13C NMR (125 MHz, CDCl3) *δ* 158.9, 148.9, 147.2, 122.7, 120.7, 24.4, 20.8, 14.6. HRMS (ESI-TOF) (m/z): [M+H]+ calcd for C8H12NS+, 154.0685; found, 154.0685.

6-(Ethylthio)pyridin-3-amine (**4j**)[8]

Brown liquid (72 mg, 94% yield); *Rf*= 0.4 (Hexane/EtOAc = 3:1); 1H NMR (500 MHz, CDCl3) δ 8.02 (d, *J* = 2.9 Hz, 1H), 7.04 (dd, *J* = 8.4, 0.7 Hz, 1H), 6.91 (dd, *J* = 8.4, 2.9 Hz, 1H), 3.51 (s, 2H), 3.07 (q, *J* = 7.3 Hz, 2H), 1.31 (t, *J* = 7.4 Hz, 3H); 13C NMR (125 MHz, CDCl3) δ 146.5, 139.9, 136.9, 123.9, 123.4, 25.9, 14.7.

2-(Ethylthio)pyridin-3-amine (**4k**)[9]

Brown liquid (67 mg, 87% yield); R*f* = 0.4 (Hexane/EtOAc = 3:1); 1H NMR (500 MHz, CDCl3) *δ* 7.97 (dd, *J* = 4.2, 2.0 Hz, 1H), 6.93 – 6.83 (m, 2H), 3.23 (q, *J* = 7.4 Hz, 2H), 1.35 (t, *J* = 7.4 Hz, 3H); 13C NMR (125 MHz, CDCl3) *δ* 143.0, 140.9, 139.4, 120.6, 120.4, 25.2, 14.9.

6-(Ethylthio)pyridin-3-ol **(4l)**

Pale-yellow solid (73 mg, 94% yield); *Rf*= 0.4 (Hexane/EtOAc = 5:1); 1H NMR (500 MHz, CDCl3) *δ* 8.12 (dd, *J* = 2.8, 0.8 Hz, 1H), 7.22 (dd, *J* = 8.6, 2.8 Hz, 1H), 7.18 (dd, *J* = 8.7, 0.7 Hz, 1H), 3.02 (q, *J* = 7.3 Hz, 2H), 1.29 (t, *J* = 7.3 Hz, 3H); 13C NMR (125 MHz, CDCl3) *δ* 152.0, 148.1, 137.0, 125.8, 125.1, 26.9, 14.5. HRMS (ESI-TOF) (m/z): [M+H]+ calcd for C7H10NOS+, 156.0478; found, 156.0476.

6-(Ethylthio)-4-methylpyridin-3-amine (**4m**)

Red liquid (80 mg, 95% yield);*Rf*= 0.5 (Hexane/EtOAc = 2:1); 1H NMR (500 MHz, CDCl3) *δ* 7.93 (s, 1H), 6.95 (t, *J* = 0.7 Hz, 1H), 3.07 (q, *J* = 7.4 Hz, 2H), 2.13 (d, *J* = 0.8 Hz, 3H), 1.31 (t, *J* = 7.3 Hz, 3H); 13C NMR (125 MHz, CDCl3) *δ* 146.7, 138.8, 136.5, 132.2, 124.9, 25.8, 16.8, 14.8. HRMS (ESI-TOF) (m/z): [M+H]+ calcd for C8H13N2S+, 169.0794; found, 169.0792.

2-(Ethylthio)-3-phenylpyridine (**4n)**

Yellow liquid (91 mg, 85% yield); *Rf*= 0.5 (Hexane/EtOAc = 10:1); 1H NMR (500 MHz, CDCl3) *δ* 8.46 (dd, *J* = 4.9, 1.7 Hz, 1H), 7.50 – 7.42 (m, 5H), 7.41 (dd, *J* = 7.4, 1.8 Hz, 1H), 7.06 (dd, *J* = 7.5, 4.9 Hz, 1H), 3.19 (q, *J* = 7.3 Hz, 2H), 1.35 (t, *J* = 7.4 Hz, 3H).；13C NMR (125 MHz, CDCl3) *δ* 157.5, 147.9, 138.2, 136.3, 136.0, 129.1, 128.3, 128.0, 118.8, 24.6, 14.3. HRMS (ESI-TOF) (m/z): [M+H]+ calcd for C13H14NS+, 216.0841; found, 216.0839.

6-(Ethylthio)-N,N-dimethylpicolinamide (**4o)**

Yellow liquid (92 mg, 88% yield); *Rf*= 0.4 (Hexane/EtOAc = 2:1); 1H NMR (500 MHz, CDCl3) *δ* 7.54 (t, *J* = 7.8 Hz, 1H), 7.29 (d, *J* = 7.5 Hz, 1H), 7.16 (d, *J* = 8.1 Hz, 1H), 3.15 (q, *J* = 7.4 Hz, 2H), 3.10 (d, *J* = 17.2 Hz, 6H), 1.34 (t, *J* = 7.4 Hz, 3H)； 13C NMR (125 MHz, CDCl3) *δ* 168.5, 158.1, 154.0, 136.6, 122.7, 119.1, 39.0, 35.8, 24.2, 14.6. HRMS (ESI-TOF) (m/z): [M+Na]+ calcd for C10H14N2NaOS+, 233.0719; found, 233.0715.

2-(Ethylthio)-3-iodopyridine (**4p**)

Brown liquid (119 mg, 90% yield); *Rf*= 0.4 (Hexane/EtOAc = 5:1); 1H NMR (500 MHz, CDCl3) *δ* 8.39 (dd, *J* = 4.7, 1.6 Hz, 1H), 7.90 (dd, *J* = 7.7, 1.6 Hz, 1H), 6.70 (dd, *J* = 7.7, 4.7 Hz, 1H), 3.13 (q, *J* = 7.4 Hz, 2H), 1.37 (t, *J* = 7.4 Hz, 3H); 13C NMR (125 MHz, CDCl3) *δ* 161.8, 148.1, 145.7, 119.9, 93.7, 26.9, 14.0. HRMS (ESI-TOF) (m/z): [M+H]+ calcd for C7H9INS+, 265.9500; found, 265.9504.

6-(Ethylthio)picolinonitrile (**4q**)

Brown solid (71 mg, 87% yield); MP: 50-52 oC, *Rf*= 0.4 (Hexane/EtOAc = 3:1); 1H NMR (500 MHz, CDCl3) *δ* 8.64 (d, *J* = 2.5 Hz), 7.63 (dd, *J* = 8.4, 2.2 Hz), 7.21 (dd, *J* = 8.4, 0.9 Hz), 3.19 (q, *J* = 7.4 Hz, 2H), 1.37 (t, *J* = 7.4 Hz, 3H); 13C NMR (125 MHz, CDCl3) *δ* 165.6, 152.1, 137.6, 121.7, 117.1, 104.3, 24.5, 14.2. HRMS (ESI-TOF) (m/z): [M+H]+ calcd for C8H9N2S+, 165.0481; found, 165.0481.

3,5-Bis(ethylthio)pyridine (**4r**)

Brown liquid (40 mg, 40% yield); *Rf*= 0.4 (Hexane/EtOAc = 5:1); 1H NMR (500 MHz, CDCl3) *δ* 8.32 (s, 2H), 7.55 (s, 1H), 2.95 (q, *J* = 7.4 Hz, 4H), 1.31 (t, *J* = 7.4 Hz, 6H); 13C NMR (125 MHz, CDCl3) *δ* 146.5 (2C), 136.6 (2C), 134.0, 27.6 (2C), 14.2 (2C). HRMS (ESI-TOF) (m/z): [M+H]+ calcd for C9H14NS2+, 200.0562; found, 200.0559.

2-(Ethylthio)-5-iodopyrimidine (**4s**)[5]

Brown solid (122 mg, 92% yield); MP: 64-65 oC, *Rf*= 0.5 (Hexane/EtOAc = 3:1); 1H NMR (500 MHz, CDCl3) *δ* 8.64 (s, 2H), 3.09 (q, *J* = 7.4 Hz, 2H), 1.36 (t, *J* = 7.4 Hz, 3H); 13C NMR (125 MHz, CDCl3) *δ* 171.1, 162.2 (2C), 86.2, 25.4, 14.2.

4-(Ethylsulfonyl)aniline (**5a**)

Yellow liquid (138 mg, 93% yield); *Rf*= 0.5 (Hexane/EtOAc = 3:1); 1H NMR (500 MHz, CDCl3) *δ* 8.58 (dd, *J* = 4.6, 1.5 Hz, 1H), 8.40 (dd, *J* = 8.0, 1.5 Hz, 1H), 7.20 (dd, *J* = 8.0, 4.5 Hz, 1H), 3.67 (q, *J* = 7.4 Hz, 2H), 1.46 (t, *J* = 7.4 Hz, 3H); 13C NMR (125 MHz, CDCl3) *δ* 157.3, 150.9, 147.2, 127.3, 86.1, 46.0, 7.2. HRMS (ESI-TOF) (m/z): [M]+ calcd for C7H8INO2S+, 296.9553; found, 296.9551.

2-((1-Chloroethyl)thio)-3-iodopyridine (**5b**)

Yellow liquid (136 mg, 91% yield); R*f* = 0.5 (Hexane/EtOAc = 5:1); 1H NMR (500 MHz, CDCl3) *δ* 8.50 (dt, *J* = 4.7, 1.2 Hz, 1H), 7.98 (dt, *J* = 7.7, 1.2 Hz, 1H), 6.82 (ddd, *J* = 7.8, 4.7, 0.8 Hz, 1H), 6.19 (q, *J* = 6.9 Hz, 1H), 2.01 (d, *J* = 6.9 Hz, 3H); 13C NMR (125 MHz, CDCl3) *δ* 158.8, 148.4, 146.2, 121.1, 93.2, 61.9, 25.7. HRMS (ESI-TOF) (m/z): [M+Na]+ calcd for C7H7ClINNaS+, 321.8925; found, 321.8917.

Ethyl(imino)(3-iodopyridin-2-yl)-λ6-sulfanone (**5c**)

Yellow liquid (132 mg, 89% yield); *Rf*= 0.5 (Hexane/EtOAc = 3:1); 1H NMR (500 MHz, CDCl3) *δ* 8.51 (dd, *J* = 4.6, 1.5 Hz, 1H), 8.32 (dd, *J* = 7.9, 1.5 Hz, 1H), 7.11 (dd, *J* = 7.9, 4.6 Hz, 1H), 3.71 (ddt, *J* = 70.8, 14.2, 7.2 Hz, 2H), 1.43 (t, *J* = 7.4 Hz, 3H); 13C NMR (125 MHz, CDCl3) δ 159.3, 150.4, 147.1, 126.4, 85.1, 46.5, 7.7. HRMS (ESI-TOF) (m/z): [M+H]+ calcd for C7H10IN2OS+, 296.9553; found, 296.9551.

2-(Ethylthio)-5-(4-methylthiophen-2-yl)pyridine (**5e**)

Yellow liquid (92 mg, 78% yield); *Rf*= 0.4 (Hexane/EtOAc = 5:1); 1H NMR (500 MHz, CDCl3) *δ* 8.88 (s, 1H), 8.58 (d, *J* = 4.5 Hz, 1H), 8.06 (dt, *J* = 7.9, 2.0 Hz, 1H), 7.39 (dd, *J* = 7.9, 4.9 Hz, 1H), 7.08 (d, *J* = 1.2 Hz, 1H), 2.52 (q, *J* = 7.4 Hz, 3H), 2.36 (d, *J* = 1.0 Hz, 2H), 1.01 (t, *J* = 7.4 Hz, 3H); 13C NMR (125 MHz, CDCl3) *δ* 149.3, 147.9, 142.2, 141.9, 137.4, 131.1, 128.9, 123.3, 120.7, 29.9, 16.0, 14.5. HRMS (ESI-TOF) (m/z): [M+H]+ calcd for C12H14NS2+, 236.0557; found, 236.0562.

1,2-dibenzyldisulfane (**5f**)[10]

White solid (107 mg, 87% yield), MP: 71-72 oC; *Rf*= 0.5 (Hexane/EtOAc = 20:1); 1H NMR (400 MHz, CDCl3) δ 7.36 – 7.29 (m, 5H), 7.29 – 7.23 (m, 5H), 3.62 (s, 4H); 13C NMR (100 MHz, CDCl3) δ 137.4 (2C), 129.4 (4C), 128.5 (4C), 127.4 (2C), 43.4 (2C).

**References:**

[1] [Itoh, T.;](https://pubs.acs.org/action/doSearch?field1=Contrib&text1=Takahiro++Itoh) [Mase,](https://pubs.acs.org/action/doSearch?field1=Contrib&text1=Toshiaki++Mase) T. A General Palladium-Catalyzed Coupling of Aryl Bromides/Triflates and Thiols, *Org. Lett*., **2004**, *6*, 4587–4590.

[2] Chen, B.; Wang, J.; Sun, W.; Pan, Y.; Ding, A.; Liu, W.; Guo, H. [Thioxanthone-TfOH Complex (9-HTXTF) Photoredox Enabled Reduction of Sulfoxides](https://scifinder-n.cas.org/navigate/?answerSetKey=null&appId=ba2c7d44-115e-4e2f-877b-a713c6ab20bc&backKey=6638a3d7c7d5ab482c7c1641&clearSearch=true&contentUri=document%2Fpt%2Fdocument%2F67687065&isFromRetrosynthesis=false&metricsOrdinal=1&metricsSourceUri=document%2Fpt%2Fdocument%2F67687065&resultType=reference&resultView=detail&state=searchDetail.reference&suppressNavigation=true&uiContext=366&uiSubContext=551&uriForDetails=document%2Fpt%2Fdocument%2F67687065&uriList=document%2Fpt%2Fdocument%2F67687065), *Tetrahedron* *Letters*, **2024**, *139*, 155007.

[3] Liu, Y.; Kim, J.; Seo, H.; Park, S.; Chae, J. Copper(II)-Catalyzed Single-Step Synthesis of Aryl Thiols from Aryl Halides and 1,2-Ethanedithiol, *Adv. Synth. Catal.*, **2015**, *357*, 2205 - 2212.

[4] Ryota, I.; Miki, B.; Kei, M.; Junichiro, Y. Ni-Catalyzed Aryl Sulfide Synthesis through an Aryl Exchange Reaction, *J. Am. Chem. Soc.*, **2021**, *143*, 10333–10340.

[5] Zhang, H.; Cao, W.; Ma, D. L‐Proline-Promoted CuI-Catalyzed C-S Bond Formation between Aryl Iodides and Thiols, *Synth. Commun.*, **2007**, *37*, 25-35.

[6] Anuradha, N.; Imran, K.; Somraj, G.; Govindasamy, S. Visible-Light-Driven Halogen-Bond-Assisted Direct Synthesis of Heteroaryl Thioethers Using Transition-Metal-Free One-Pot C-I Bond Formation/C-S Cross-Coupling Reaction, *J. Org. Chem.*, **2021**, *86*, 2570−2581.

[7] Benjamin, H.; Moritz, B.; Paul, K.; Thiolation of Pyridine-2-sulfonamides using Magnesium Thiolates, *Synthesis*, **2019**, *51*, 4452-4462.

[8] Forrest, H. S.; Walker, J. Chemotherapeutic Agents of the Sulphone type. Part V. 2: 5-Disubstituted Derivatives of Pyridine, *J. Chem. Soc.*, **1948**, 1939-1945.

[9] Beugelmansm, R.; Bois-Choussy, M.; Boudet, B. Etude des Reactions de srn1-partie 10: Action de Sulfanions sur les Halogenures d'aryle Fonctionnalises. Synthese Directe de Benzothiophenes et Thienopyridines, *Tetrahedron*, **1983**, *39*, 4153-4161.

[10] M. Obe; K. Tanaka; K. Nishiyama; W. Ando; Aerobic Oxidation of Thiols to Disulfides Catalyzed by Diaryl Tellurides under Photosensitized Conditions, *J. Org. Chem.*, **2011**, 76, 4173-4177.

# **E. 1H NMR and 13C NMR spectra for products**

**1H NMR (400 MHz, CDCl3) spectrum of compound 3a**

**13C NMR (100 MHz, CDCl3) spectrum of compound 3a**

**1H NMR (400 MHz, CDCl3) spectrum of compound 3b**

**13C NMR (100 MHz, CDCl3) spectrum of compound 3b**

**1H NMR (400 MHz, CDCl3) spectrum of compound 3c**

**13C NMR (100 MHz, CDCl3) spectrum of compound 3c**

**1H NMR (400 MHz, CDCl3) spectrum of compound 3d**

**13C NMR (100 MHz, CDCl3) spectrum of compound 3d**

**1H NMR (400 MHz, CDCl3) spectrum of compound 3e**

**13C NMR (100 MHz, CDCl3) spectrum of compound 3e**

**1H NMR (400 MHz, CDCl3) spectrum of compound 3f**

**13C NMR (100 MHz, CDCl3) spectrum of compound 3f**

**1H NMR (400 MHz, CDCl3) spectrum of compound 3g**

**13C NMR (100 MHz, CDCl3) spectrum of compound 3g**

**19F NMR (376MHz, CDCl3) spectrum of compound 3g**

**1H NMR (400 MHz, CDCl3) spectrum of compound 3h**

**13C NMR (100 MHz, CDCl3) spectrum of compound 3h**

**19F NMR (376MHz, CDCl3) spectrum of compound 3h**

**1H NMR (400 MHz, CDCl3) spectrum of compound 3i**

**13C NMR (100 MHz, CDCl3) spectrum of compound 3i**

**1H NMR (400 MHz, CDCl3) spectrum of compound 3j**

**13C NMR (100 MHz, CDCl3) spectrum of compound 3j**

**1H NMR (400 MHz, CDCl3) spectrum of compound 3k**

**13C NMR (100 MHz, CDCl3) spectrum of compound 3k**

**1H NMR (400 MHz, CDCl3) spectrum of compound 3l**

**13C NMR (100 MHz, CDCl3) spectrum of compound 3l**

**19F NMR (376 MHz, CDCl3) spectrum of compound 3l**

**1H NMR (400 MHz, CDCl3) spectrum of compound 3m**

**13C NMR (100 MHz, CDCl3) spectrum of compound 3m**

**1H NMR (400 MHz, CDCl3) spectrum of compound 3n**

**13C NMR (100 MHz, CDCl3) spectrum of compound 3n**

**1H NMR (400 MHz, CDCl3) spectrum of compound 3o**

**13C NMR (100 MHz, CDCl3) spectrum of compound 3o**

**1H NMR (400 MHz, CDCl3) spectrum of compound 3p**

**13C NMR (100 MHz, CDCl3) spectrum of compound 3p**

**13F NMR (376 MHz, CDCl3) spectrum of compound 3p**

**1H NMR (400 MHz, CDCl3) spectrum of compound 3q**

**13C NMR (100 MHz, CDCl3) spectrum of compound 3q**

**1H NMR (400 MHz, CDCl3) spectrum of compound 3r**

**13C NMR (100 MHz, CDCl3) spectrum of compound 3r**

**1H NMR (400 MHz, CDCl3) spectrum of compound 3s**

**13C NMR (100 MHz, CDCl3) spectrum of compound 3s**

**1H NMR (400 MHz, CDCl3) spectrum of compound 3t**

**13C NMR (100 MHz, CDCl3) spectrum of compound 3t**

**1H NMR (400 MHz, CDCl3) spectrum of compound 3u**

**13C NMR (100 MHz, CDCl3) spectrum of compound 3u**

**1H NMR (400 MHz, CDCl3) spectrum of compound 3v**

**13C NMR (100 MHz, CDCl3) spectrum of compound 3v**

**1H NMR (400 MHz, CDCl3) spectrum of compound 3w**

**13C NMR (100 MHz, CDCl3) spectrum of compound 3w**

**1H NMR (400 MHz, CDCl3) spectrum of compound 3x**

**13C NMR (100 MHz, CDCl3) spectrum of compound 3x**

**1H NMR (400 MHz, CDCl3) spectrum of compound 3y**

**13C NMR (100 MHz, CDCl3) spectrum of compound 3y**

**1H NMR (400 MHz, CDCl3) spectrum of compound 3z**

**13C NMR (100 MHz, CDCl3) spectrum of compound 3z**

**1H NMR (400 MHz, CDCl3) spectrum of compound 3aa**

**13C NMR (100 MHz, CDCl3) spectrum of compound 3aa**

**1H NMR (400 MHz, CDCl3) spectrum of compound 3ab**

**13C NMR (100 MHz, CDCl3) spectrum of compound 3ab**

**1H NMR (400 MHz, CDCl3) spectrum of compound 3ac**

**13C NMR (100 MHz, CDCl3) spectrum of compound 3ac**

**1H NMR (400 MHz, CDCl3) spectrum of compound 3ad**

**13C NMR (100 MHz, CDCl3) spectrum of compound 3ad**

**1H NMR (400 MHz, CDCl3) spectrum of compound 3ae**

**13C NMR (100 MHz, CDCl3) spectrum of compound 3ae**

**1H NMR (400 MHz, CDCl3) spectrum of compound 3af**

**13C NMR (100 MHz, CDCl3) spectrum of compound 3af**

**1H NMR (500 MHz, CDCl3) spectrum of compound 3ag**

**13C NMR (125 MHz, CDCl3) spectrum of compound 3ag**

**1H NMR (400 MHz, CDCl3) spectrum of compound 3ah**

**13C NMR (100 MHz, CDCl3) spectrum of compound 3ah**

**1H NMR (500 MHz, CDCl3) spectrum of compound 4a**

**13C NMR (125 MHz, CDCl3) spectrum of compound 4a**

**1H NMR (500 MHz, CDCl3) spectrum of compound 4b**

**13C NMR (125 MHz, CDCl3) spectrum of compound 4b**

**1H NMR (500 MHz, CDCl3) spectrum of compound 4c**

**13C NMR (125 MHz, CDCl3) spectrum of compound 4c**

**1H NMR (500 MHz, CDCl3) spectrum of compound 4d**

**13C NMR (125 MHz, CDCl3) spectrum of compound 4d**

**1H NMR (500 MHz, CDCl3) spectrum of compound 4e**

**13C NMR (125 MHz, CDCl3) spectrum of compound 4e**

**1H NMR (500 MHz, CDCl3) spectrum of compound 4f**

**13C NMR (125 MHz, CDCl3) spectrum of compound 4f**

**1H NMR (500 MHz, CDCl3) spectrum of compound 4g**

**13C NMR (125 MHz, CDCl3) spectrum of compound 4g**

**1H NMR (500 MHz, CDCl3) spectrum of compound 4h**

**13C NMR (125 MHz, CDCl3) spectrum of compound 4h**

**1H NMR (500 MHz, CDCl3) spectrum of compound 4i**

**13C NMR (125 MHz, CDCl3) spectrum of compound 4i**

**1H NMR (500 MHz, CDCl3) spectrum of compound 4j**

**13C NMR (125 MHz, CDCl3) spectrum of compound 4j**

**1H NMR (500 MHz, CDCl3) spectrum of compound 4k**

**13C NMR (125 MHz, CDCl3) spectrum of compound 4k**

**1H NMR (500 MHz, CDCl3) spectrum of compound 4l**

**13C NMR (125 MHz, CDCl3) spectrum of compound 4l**

**1H NMR (500 MHz, CDCl3) spectrum of compound 4m**

**13C NMR (125 MHz, CDCl3) spectrum of compound 4m**

**1H NMR (500 MHz, CDCl3) spectrum of compound 4n**

**13C NMR (125 MHz, CDCl3) spectrum of compound 4n**

**1H NMR (500 MHz, CDCl3) spectrum of compound 4o**

**13C NMR (125 MHz, CDCl3) spectrum of compound 4o**

**1H NMR (500 MHz, CDCl3) spectrum of compound 4p**

**13C NMR (125 MHz, CDCl3) spectrum of compound 4p**

**1H NMR (500 MHz, CDCl3) spectrum of compound 4q**

**13C NMR (125 MHz, CDCl3) spectrum of compound 4q**

**1H NMR (500 MHz, CDCl3) spectrum of compound 4r**

**13C NMR (125 MHz, CDCl3) spectrum of compound 4r**

**1H NMR (500 MHz, CDCl3) spectrum of compound 4s**

**13C NMR (125 MHz, CDCl3) spectrum of compound 4s**

**1H NMR (500 MHz, CDCl3) spectrum of compound 5a**

**13C NMR (125 MHz, CDCl3) spectrum of compound 5a**

**1H NMR (500 MHz, CDCl3) spectrum of compound 5b**

**13C NMR (125 MHz, CDCl3) spectrum of compound 5b**

**1H NMR (500 MHz, CDCl3) spectrum of compound 5c**

**13C NMR (125 MHz, CDCl3) spectrum of compound 5c**

**1H NMR (500 MHz, CDCl3) spectrum of compound 5e**

**13C NMR (125 MHz, CDCl3) spectrum of compound 5e**

**1H NMR (400 MHz, CDCl3) spectrum of compound 5f**

**13C NMR (100 MHz, CDCl3) spectrum of compound 5f**
